# Supplementary material for: From Single Storms to Global Waves: A Global 2.5 km ICON Simulation of Weather and Climate
Source: Copernicus journal article supplement (doi:10.5194/egusphere-2025-6414), 2026-01-13
Supplement: Supplementary file [file egusphere-2025-6414-AC5-supplement.pdf]

## Editor Comments

Dear Authors, please consider the following comments on your submission. First, there is something wrong with references in lines 339 and 341. Please correct. Second, and more importantly, figures are relatively small and thus it is difficult to see details. Please use the entire page width to show figures. This comment applies to most figures. Finally, I prefer to have figures embedded in the text in the vicinity when they discussed rather than grouped at the manuscript end. This makes reading the manuscript more easy. Please consider these comments while preparing the final version of the submission.

Dear Editor,

Thank you for these comments.

- We corrected the issue with the references in lines 339 and 341.
- We increased the sizes of the images to the full page width.
- And, we moved the figures to the approximate location where they are described in the text.
